# Supplementary material for: The stepped wedge trial design: a systematic review
Source: Springer Nature journal article supplement (doi:10.1186/1471-2288-6-54), 2006-11-08
Supplement: Additional file 1 [file 1471-2288-6-54-s1.doc]

**Additional Data File 1: Data Extraction Proforma**
